# Supplementary material for: Dimensional compatibility and limitations of tracheal intubation through supraglottic airway devices: a mannequin-based in vitro study
Source: Springer Nature journal article supplement (doi:10.1007/s12630-021-01993-5), 2021-05-20

eFig. 1 The fibroscope mounted with a tracheal tube Parker Flex size 7.5 entering the SGA AuraGain #5 showing the free distance for manipulation of the fiberoptic scope between the tip of the TT and the SGA connector. In this case the free distance was measured as 2 cm.

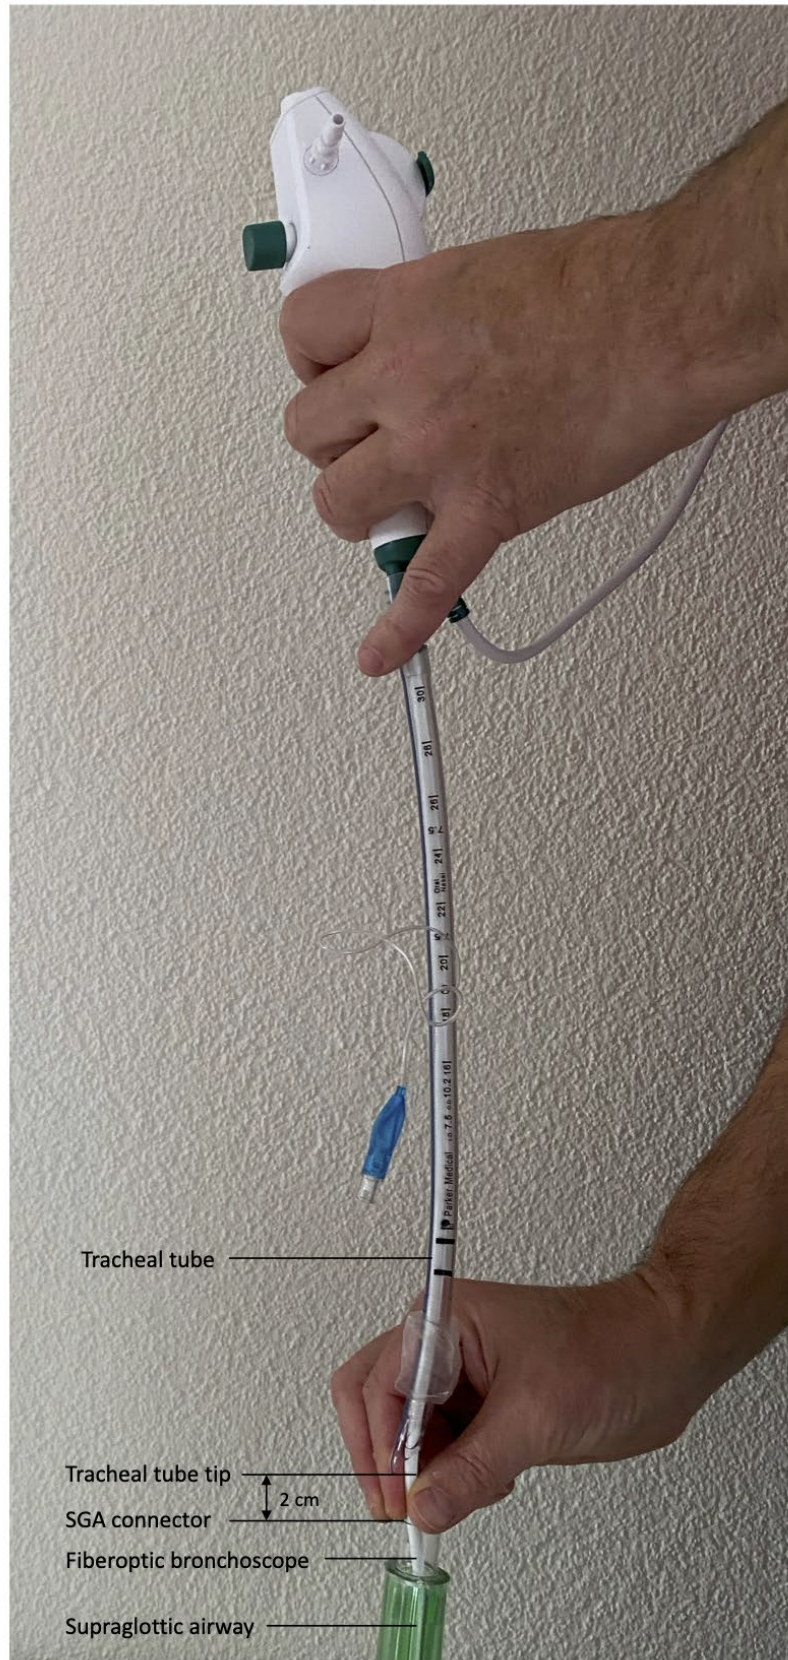

eFig. 2 The tip of a Microcuff TT size 6.5 inserted in the conus of the adapter of the SGA Portex #4. On the left side, the connector is still in the SGA and on the right side, for a better view of the connector, it was pulled out of the SGA.

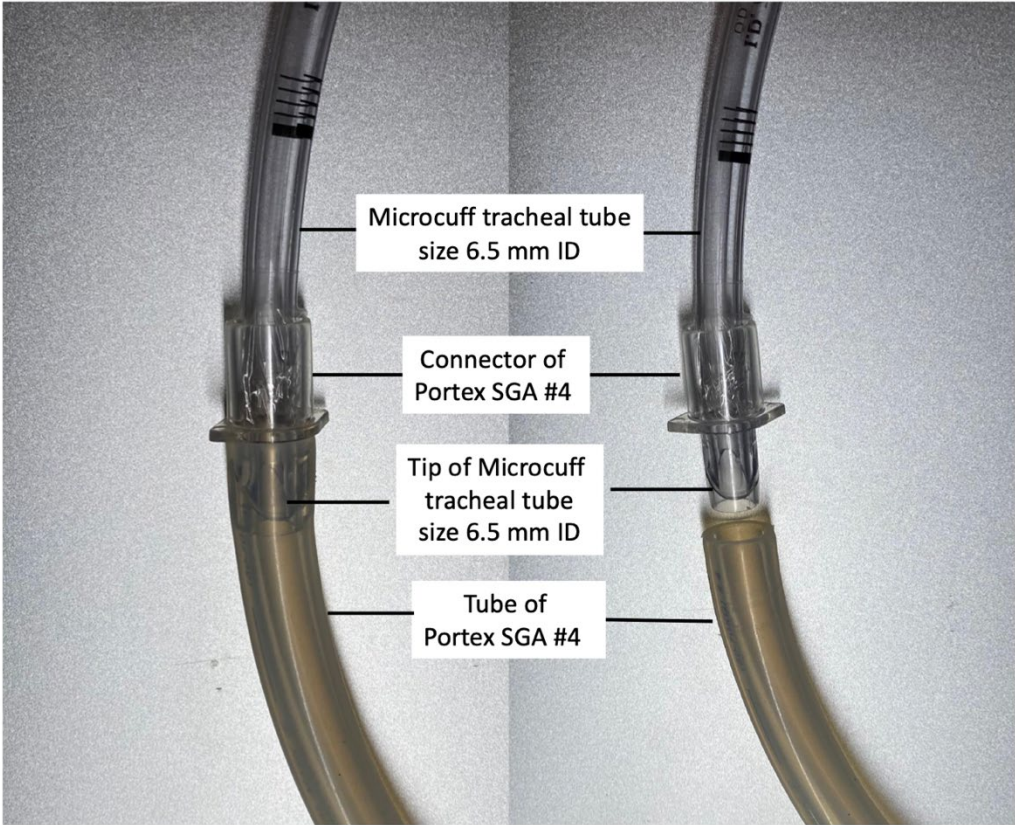

Supplement: MOESM1 [file 19181292]
